# Supplementary material for: Metabolome and Transcriptome Analysis Reveals Putative Genes Involved in Anthocyanin Accumulation and Coloration in White and Pink Tea (Camellia sinensis) Flower
Source: MDPI journal article supplement (doi:10.3390/molecules25010190), 2020-01-02
Supplement: s1 [file s1]

# Supplementary S1

**Table S1. Differentially expressed metabolites (DEMs) during white tea flower(ZJW) and pink tea flower(BTP)**

|                        | group        | DEMs_total | DEMs_up | DEMs_down |
|------------------------|--------------|------------|---------|-----------|
| Pvalue=0.05 FC=1 VIP=1 | ZJW1_vs_ZJW2 | 260        | 135     | 125       |
|                        | ZJW1_vs_ZJW3 | 245        | 132     | 113       |
|                        | ZJW1_vs_ZJW4 | 338        | 173     | 165       |
|                        | ZJW1_vs_ZJW5 | 350        | 200     | 150       |
|                        | ZJW1_vs_BTP1 | 197        | 56      | 141       |
|                        | ZJW2_vs_ZJW3 | 62         | 39      | 23        |
|                        | ZJW2_vs_ZJW4 | 193        | 102     | 91        |
|                        | ZJW2_vs_ZJW5 | 257        | 149     | 108       |
|                        | ZJW2_vs_BTP2 | 223        | 72      | 151       |
|                        | ZJW3_vs_ZJW4 | 79         | 47      | 32        |
|                        | ZJW3_vs_ZJW5 | 155        | 96      | 59        |

|  |              |     |     |     |
|--|--------------|-----|-----|-----|
|  | ZJW3_vs_BTP3 | 208 | 64  | 144 |
|  | ZJW4_vs_ZJW5 | 146 | 109 | 37  |
|  | ZJW4_vs_BTP4 | 188 | 63  | 125 |
|  | ZJW5_vs_BTP5 | 228 | 63  | 165 |
|  | BTP1_vs_BTP2 | 50  | 30  | 20  |
|  | BTP1_vs_BTP3 | 77  | 44  | 33  |
|  | BTP1_vs_BTP4 | 105 | 64  | 41  |
|  | BTP1_vs_BTP5 | 116 | 74  | 42  |
|  | BTP2_vs_BTP3 | 15  | 9   | 6   |
|  | BTP2_vs_BTP4 | 74  | 54  | 20  |
|  | BTP2_vs_BTP5 | 86  | 61  | 25  |
|  | BTP3_vs_BTP4 | 42  | 35  | 7   |
|  | BTP3_vs_BTP5 | 69  | 53  | 16  |
|  | BTP4_vs_BTP5 | 20  | 15  | 5   |

**Figure S1**

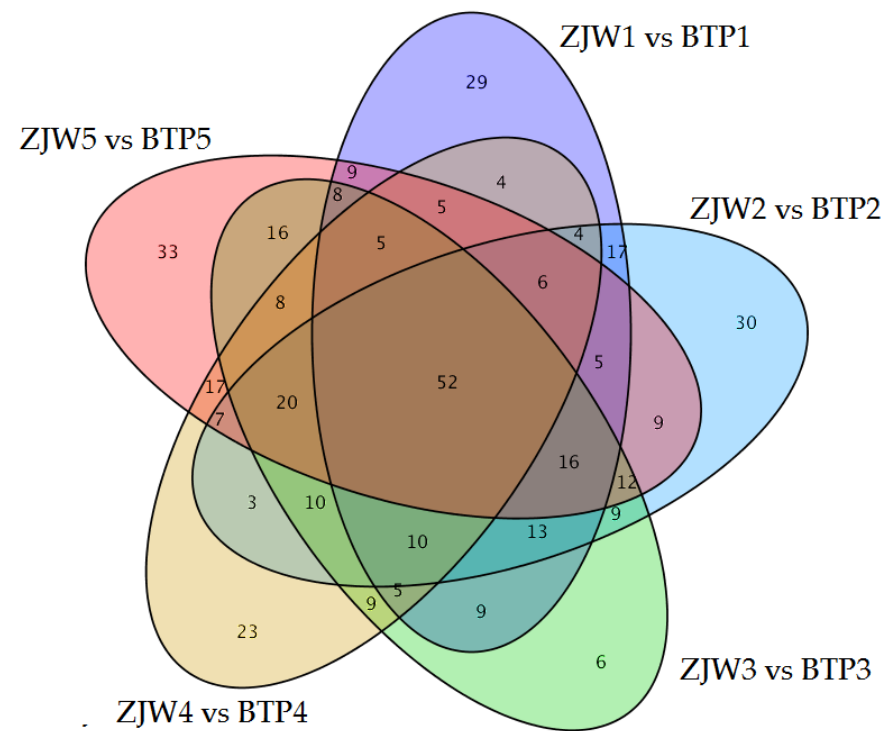

**Figure S1. DEMs statistics and Venn diagrams between white flower tea development stages.**

**Table S2. Overview of the transcriptome sequencing dataset and quality check.**

| <b>BMK-ID</b> | <b>Clean reads</b> | <b>Clean bases</b> | <b>GC Content</b> | <b>%≥Q30</b> |
|---------------|--------------------|--------------------|-------------------|--------------|
| BTP11         | 23,668,665         | 7,057,954,060      | 44.44%            | 86.78%       |
| BTP12         | 26,153,281         | 7,804,636,930      | 44.36%            | 88.13%       |
| BTP13         | 23,869,766         | 7,124,268,318      | 43.95%            | 87.54%       |
| BTP21         | 25,455,270         | 7,579,737,926      | 44.29%            | 87.64%       |
| BTP22         | 31,208,670         | 9,316,682,038      | 44.53%            | 89.02%       |
| BTP23         | 23,867,889         | 7,096,074,108      | 44.76%            | 86.94%       |
| BTP31         | 31,292,398         | 9,352,405,318      | 44.52%            | 88.85%       |
| BTP32         | 26,972,499         | 8,016,173,786      | 44.56%            | 87.77%       |
| BTP33         | 27,206,056         | 8,119,153,772      | 44.49%            | 88.16%       |
| BTP41         | 30,166,304         | 8,954,093,392      | 44.55%            | 88.48%       |
| BTP42         | 27,381,944         | 8,125,553,048      | 44.37%            | 88.07%       |

| BMK-ID | Clean reads | Clean bases   | GC Content | %≥Q30  |
|--------|-------------|---------------|------------|--------|
| BTP43  | 31,911,343  | 9,513,539,518 | 44.34%     | 88.67% |
| BTP51  | 21,561,262  | 6,436,558,604 | 45.34%     | 85.01% |
| BTP52  | 23,149,731  | 6,873,130,538 | 45.55%     | 87.02% |
| BTP53  | 23,033,043  | 6,867,835,118 | 44.93%     | 85.27% |
| ZJW11  | 24,401,173  | 7,272,491,122 | 44.91%     | 85.34% |
| ZJW12  | 21,739,300  | 6,470,253,566 | 44.38%     | 85.88% |
| ZJW13  | 21,682,289  | 6,448,733,710 | 44.57%     | 85.29% |
| ZJW21  | 20,915,131  | 6,229,932,294 | 45.22%     | 85.24% |
| ZJW22  | 22,420,616  | 6,674,212,962 | 44.78%     | 85.01% |
| ZJW23  | 21,883,981  | 6,513,593,344 | 44.73%     | 85.21% |
| ZJW31  | 20,935,452  | 6,220,494,474 | 45.17%     | 85.01% |
| ZJW32  | 21,362,041  | 6,362,838,760 | 45.30%     | 85.73% |
| ZJW33  | 23,929,435  | 7,138,488,744 | 44.90%     | 85.05% |

| BMK-ID | Clean reads | Clean bases   | GC Content | %≥Q30  |
|--------|-------------|---------------|------------|--------|
| ZJW41  | 25,751,867  | 7,692,097,820 | 45.21%     | 87.27% |
| ZJW42  | 24,301,648  | 7,234,121,756 | 45.28%     | 88.20% |
| ZJW43  | 24,896,357  | 7,406,220,944 | 44.88%     | 88.16% |
| ZJW51  | 21,291,989  | 6,355,399,448 | 45.26%     | 87.70% |
| ZJW52  | 22,152,462  | 6,614,402,460 | 45.24%     | 87.49% |
| ZJW53  | 28,163,774  | 8,376,422,666 | 45.03%     | 88.19% |

1–3: Three biological replicates of each tissue at tea flower development stage; Raw reads: original number of reads obtained by sequencing; Clean reads: number of reads after removing low-quality reads and trimming adapter sequences; Clean bases: number of clean reads multiplied by length of clean reads. Q30: Phred score, indicates 99% and 99.9% accuracy of sequenced bases; GC content: percentage of G and C in total bases.

**Table S3. Clean reads mapped to the reference genome in tea flower development.**

| <b>BMK-ID</b> | <b>Total Reads</b> | <b>Mapped Reads</b> | <b>Uniq Mapped Reads</b> | <b>Multiple Map Reads</b> | <b>Reads Map to '+'</b> | <b>Reads Map to '-'</b> |
|---------------|--------------------|---------------------|--------------------------|---------------------------|-------------------------|-------------------------|
| BTP11         | 47,337,330         | 37,422,883 (79.06%) | 36,178,993 (76.43%)      | 1,243,890 (2.63%)         | 18,577,511 (39.24%)     | 18,623,603 (39.34%)     |
| BTP12         | 52,306,562         | 41,528,122 (79.39%) | 40,141,768 (76.74%)      | 1,386,354 (2.65%)         | 20,608,596 (39.40%)     | 20,678,371 (39.53%)     |
| BTP13         | 47,739,532         | 37,636,163 (78.84%) | 36,399,620 (76.25%)      | 1,236,543 (2.59%)         | 18,686,335 (39.14%)     | 18,735,466 (39.25%)     |
| BTP21         | 50,910,540         | 39,934,373 (78.44%) | 38,579,973 (75.78%)      | 1,354,400 (2.66%)         | 19,797,265 (38.89%)     | 19,901,130 (39.09%)     |
| BTP22         | 62,417,340         | 48,507,551 (77.71%) | 46,952,204 (75.22%)      | 1,555,347 (2.49%)         | 24,058,387 (38.54%)     | 24,174,268 (38.73%)     |
| BTP23         | 47,735,778         | 37,434,584 (78.42%) | 36,167,403 (75.77%)      | 1,267,181 (2.65%)         | 18,552,881 (38.87%)     | 18,649,087 (39.07%)     |
| BTP31         | 62,584,796         | 49,101,031 (78.46%) | 47,554,132 (75.98%)      | 1,546,899 (2.47%)         | 24,377,166 (38.95%)     | 24,443,914 (39.06%)     |
| BTP32         | 53,944,998         | 42,116,688 (78.07%) | 40,744,631 (75.53%)      | 1,372,057 (2.54%)         | 20,886,414 (38.72%)     | 20,964,314 (38.86%)     |
| BTP33         | 54,412,112         | 42,647,825 (78.38%) | 41,334,061 (75.96%)      | 1,313,764 (2.41%)         | 21,161,580 (38.89%)     | 21,234,625 (39.03%)     |
| BTP41         | 60,332,608         | 47,334,361 (78.46%) | 45,735,146 (75.81%)      | 1,599,215 (2.65%)         | 23,472,221 (38.90%)     | 23,541,859 (39.02%)     |
| BTP42         | 54,763,888         | 41,994,541 (76.68%) | 40,595,379 (74.13%)      | 1,399,162 (2.55%)         | 20,823,492 (38.02%)     | 20,893,284 (38.15%)     |
| BTP43         | 63,822,686         | 50,036,327 (78.40%) | 48,382,053 (75.81%)      | 1,654,274 (2.59%)         | 24,823,383 (38.89%)     | 24,903,323 (39.02%)     |

| BMK-ID | Total Reads | Mapped Reads        | Uniq Mapped Reads   | Multiple Map Reads | Reads Map to '+'    | Reads Map to '-'    |
|--------|-------------|---------------------|---------------------|--------------------|---------------------|---------------------|
| BTP51  | 43,122,524  | 31,208,842 (72.37%) | 30,198,345 (70.03%) | 1,010,497 (2.34%)  | 15,471,758 (35.88%) | 15,548,724 (36.06%) |
| BTP52  | 46,299,462  | 34,863,566 (75.30%) | 33,434,828 (72.21%) | 1,428,738 (3.09%)  | 17,233,925 (37.22%) | 17,344,370 (37.46%) |
| BTP53  | 46,066,086  | 34,243,367 (74.34%) | 33,113,879 (71.88%) | 1,129,488 (2.45%)  | 16,967,454 (36.83%) | 17,052,198 (37.02%) |
| ZJW11  | 48,802,346  | 37,293,853 (76.42%) | 36,008,165 (73.78%) | 1,285,688 (2.63%)  | 18,493,535 (37.89%) | 18,610,192 (38.13%) |
| ZJW12  | 43,478,600  | 32,962,390 (75.81%) | 31,853,261 (73.26%) | 1,109,129 (2.55%)  | 16,347,844 (37.60%) | 16,433,698 (37.80%) |
| ZJW13  | 43,364,578  | 33,092,335 (76.31%) | 32,013,598 (73.82%) | 1,078,737 (2.49%)  | 16,402,973 (37.83%) | 16,503,569 (38.06%) |
| ZJW21  | 41,830,262  | 31,589,683 (75.52%) | 30,454,831 (72.81%) | 1,134,852 (2.71%)  | 15,652,381 (37.42%) | 15,767,875 (37.69%) |
| ZJW22  | 44,841,232  | 34,037,671 (75.91%) | 32,892,099 (73.35%) | 1,145,572 (2.55%)  | 16,870,426 (37.62%) | 16,987,705 (37.88%) |
| ZJW23  | 43,767,962  | 33,392,416 (76.29%) | 32,315,261 (73.83%) | 1,077,155 (2.46%)  | 16,553,103 (37.82%) | 16,670,821 (38.09%) |
| ZJW31  | 41,870,904  | 31,933,307 (76.27%) | 30,830,111 (73.63%) | 1,103,196 (2.63%)  | 15,834,315 (37.82%) | 15,933,041 (38.05%) |
| ZJW32  | 42,724,082  | 32,989,600 (77.22%) | 31,856,435 (74.56%) | 1,133,165 (2.65%)  | 16,352,938 (38.28%) | 16,465,577 (38.54%) |
| ZJW33  | 47,858,870  | 36,838,098 (76.97%) | 35,628,007 (74.44%) | 1,210,091 (2.53%)  | 18,256,902 (38.15%) | 18,375,347 (38.39%) |
| ZJW41  | 51,503,734  | 39,406,493 (76.51%) | 37,950,544 (73.69%) | 1,455,949 (2.83%)  | 19,538,002 (37.94%) | 19,622,512 (38.10%) |



| BMK-ID | Total Reads | Mapped Reads        | Uniq Mapped Reads   | Multiple Map Reads | Reads Map to '+'    | Reads Map to '-'    |
|--------|-------------|---------------------|---------------------|--------------------|---------------------|---------------------|
| ZJW42  | 48,603,296  | 36,630,157 (75.37%) | 35,339,355 (72.71%) | 1,290,802 (2.66%)  | 18,164,886 (37.37%) | 18,245,513 (37.54%) |
| ZJW43  | 49,792,714  | 38,744,562 (77.81%) | 37,392,013 (75.10%) | 1,352,549 (2.72%)  | 19,211,077 (38.58%) | 19,273,247 (38.71%) |
| ZJW51  | 42,583,978  | 32,400,843 (76.09%) | 31,230,927 (73.34%) | 1,169,916 (2.75%)  | 16,064,823 (37.73%) | 16,136,608 (37.89%) |
| ZJW52  | 44,304,924  | 33,625,913 (75.90%) | 32,446,166 (73.23%) | 1,179,747 (2.66%)  | 16,688,854 (37.67%) | 16,752,348 (37.81%) |
| ZJW53  | 56,327,548  | 43,193,996 (76.68%) | 41,523,939 (73.72%) | 1,670,057 (2.96%)  | 21,409,569 (38.01%) | 21,504,543 (38.18%) |

GC content: Clean Data GC content, the percentage of G and C base number in the total base number; ≥Q30: The percentage of base number which qualities of Clean Data is greater than or equal to 30 in the total base number, the number of Clean Reads is single ended calculation; Mapped Reads: The number of Reads which are compared to the reference genome and the percentage of this in Clean Reads; Uniq Mapped Reads: The number of Reads which are compared to the reference genome in single location and the percentage of this in Clean Reads.

**Table S4. DEGs statistics in different cDNA libraries during pink tea flower development**

| #Parameters                      | group                                  | DEGs_total | DEGs_up | DEGs_down |
|----------------------------------|----------------------------------------|------------|---------|-----------|
| DESeq2_EBSeq<br>FDR=0.01<br>FC=2 | BTP11&BTP13&BTP12_vs_BTP21&BTP22&BTP23 | 5282       | 2138    | 3144      |
|                                  | BTP11&BTP13&BTP12_vs_BTP31&BTP32&BTP33 | 8945       | 4076    | 4869      |
|                                  | BTP11&BTP13&BTP12_vs_BTP41&BTP42&BTP43 | 12296      | 5286    | 7010      |
|                                  | BTP11&BTP13&BTP12_vs_BTP51&BTP52&BTP53 | 11557      | 4888    | 6669      |
|                                  | BTP11&BTP13&BTP12_vs_ZJW11&ZJW12&ZJW13 | 3254       | 1348    | 1906      |
|                                  | BTP21&BTP22&BTP23_vs_BTP31&BTP32&BTP33 | 2974       | 1987    | 987       |
|                                  | BTP21&BTP22&BTP23_vs_BTP41&BTP42&BTP43 | 8318       | 3786    | 4532      |
|                                  | BTP21&BTP22&BTP23_vs_BTP51&BTP52&BTP53 | 8306       | 3882    | 4424      |
|                                  | BTP21&BTP22&BTP23_vs_ZJW21&ZJW22&ZJW23 | 3827       | 1577    | 2250      |
|                                  | BTP31&BTP32&BTP33_vs_BTP41&BTP42&BTP43 | 3006       | 1241    | 1765      |
|                                  | BTP31&BTP32&BTP33_vs_BTP51&BTP52&BTP53 | 3795       | 1678    | 2117      |

| #Parameters | group                                  | DEGs_total | DEGs_up | DEGs_down |
|-------------|----------------------------------------|------------|---------|-----------|
|             | BTP31&BTP32&BTP33_vs_ZJW31&ZJW32&ZJW33 | 5100       | 2046    | 3054      |
|             | BTP41&BTP42&BTP43_vs_BTP51&BTP52&BTP53 | 421        | 273     | 148       |
|             | BTP41&BTP42&BTP43_vs_ZJW41&ZJW42&ZJW43 | 3980       | 1870    | 2110      |
|             | BTP51&BTP52&BTP53_vs_ZJW51&ZJW52&ZJW53 | 3591       | 1587    | 2004      |
|             | ZJW11&ZJW12&ZJW13_vs_ZJW21&ZJW22&ZJW23 | 346        | 253     | 93        |
|             | ZJW11&ZJW12&ZJW13_vs_ZJW31&ZJW32&ZJW33 | 2275       | 1106    | 1169      |
|             | ZJW11&ZJW12&ZJW13_vs_ZJW41&ZJW42&ZJW43 | 6843       | 3287    | 3556      |
|             | ZJW11&ZJW12&ZJW13_vs_ZJW51&ZJW52&ZJW53 | 6331       | 2983    | 3348      |
|             | ZJW21&ZJW22&ZJW23_vs_ZJW31&ZJW32&ZJW33 | 44         | 33      | 11        |
|             | ZJW21&ZJW22&ZJW23_vs_ZJW41&ZJW42&ZJW43 | 4733       | 2450    | 2283      |
|             | ZJW21&ZJW22&ZJW23_vs_ZJW51&ZJW52&ZJW53 | 4768       | 2399    | 2369      |

| #Parameters                      | group                                  | DEGs_total | DEGs_up | DEGs_down |
|----------------------------------|----------------------------------------|------------|---------|-----------|
|                                  | ZJW31&ZJW32&ZJW33_vs_ZJW41&ZJW42&ZJW43 | 2856       | 1411    | 1445      |
|                                  | ZJW31&ZJW32&ZJW33_vs_ZJW51&ZJW52&ZJW53 | 3206       | 1477    | 1729      |
|                                  | ZJW41&ZJW42&ZJW43_vs_ZJW51&ZJW52&ZJW53 | 23         | 14      | 9         |
| DESeq2_EBSeq<br>FDR=0.01<br>FC=2 | BTP11&BTP12&BTP13_vs_ZJW21&ZJW22&ZJW23 | 7860       | 3664    | 4196      |
|                                  | BTP21&BTP22&BTP23_vs_ZJW31&ZJW32&ZJW33 | 5740       | 2873    | 2867      |
|                                  | ZJW11&ZJW12&ZJW13_vs_BTP11&BTP12&BTP13 | 5060       | 2328    | 2732      |

**Table S5 Primer sequences for qRT-PCR analysis**

| Gene           | Accession  | Forward Primer (5'to 3') | Reverse Primer (5'to 3')  | product (bp) | Tm (°C) |
|----------------|------------|--------------------------|---------------------------|--------------|---------|
| LAR            | CSNG5035   | AGACGGACGGACAGACAAAG     | GGAGTGGTGGGAAGGACCGTA     | 176          | 60      |
| LAR            | CSA019984  | ATGACTTACTTGCCGCTGCT     | GGTAGGTTTGTCTGAGGGCAT     | 116          | 60      |
| FLS            | CSA003707  | CATGTACCCACCATGCCCAC     | GAAGACCCGGAACGTCATTG      | 104          | 60      |
| FLS            | CSA006950  | CGGGACTGGGGGATATTTTCAG   | TAGACCCAGGAGGCTTAGCA      | 136          | 60      |
| F3'5'H         | CSA031792  | AGCGTGGGATGAAGAGGTTG     | AGTGCCTTGATGTTGGTCGT      | 175          | 60      |
| F3'H           | CSA004930  | CAATCACGTTTCGCGGATATGT   | ATTTCCAGCTTGGCCTTCAAA     | 130          | 60      |
| DFR            | CSNG45659  | AGCGCCCTTTCTTTACAGTTTAT  | AGGACAAGTAAAACACAAGTGGTAG | 132          | 60      |
| DFR            | CSNG38209  | TCGGTGTATTGGTGCCTTGC     | GGCAAACATAAACTCCGGTCA     | 170          | 60      |
| DFR            | CSA003949  | CCAACCAAGTTTGAGAGTGTTGA  | CTCCCACATCGTACTCATCCG     | 115          | 60      |
| $\beta$ -actin | KJ946252.1 | TGCTGGCCGTGATCTAACAG     | TGCTCGTAGTCAAGAGCGAC      | 135          | 60      |
